# Supplementary material
Source: Springer Nature journal article supplement (https://www.springermedizin.de/resource/supplementary/12957_2011_826_MOESM1_ESM.pdf/9565974)

**A**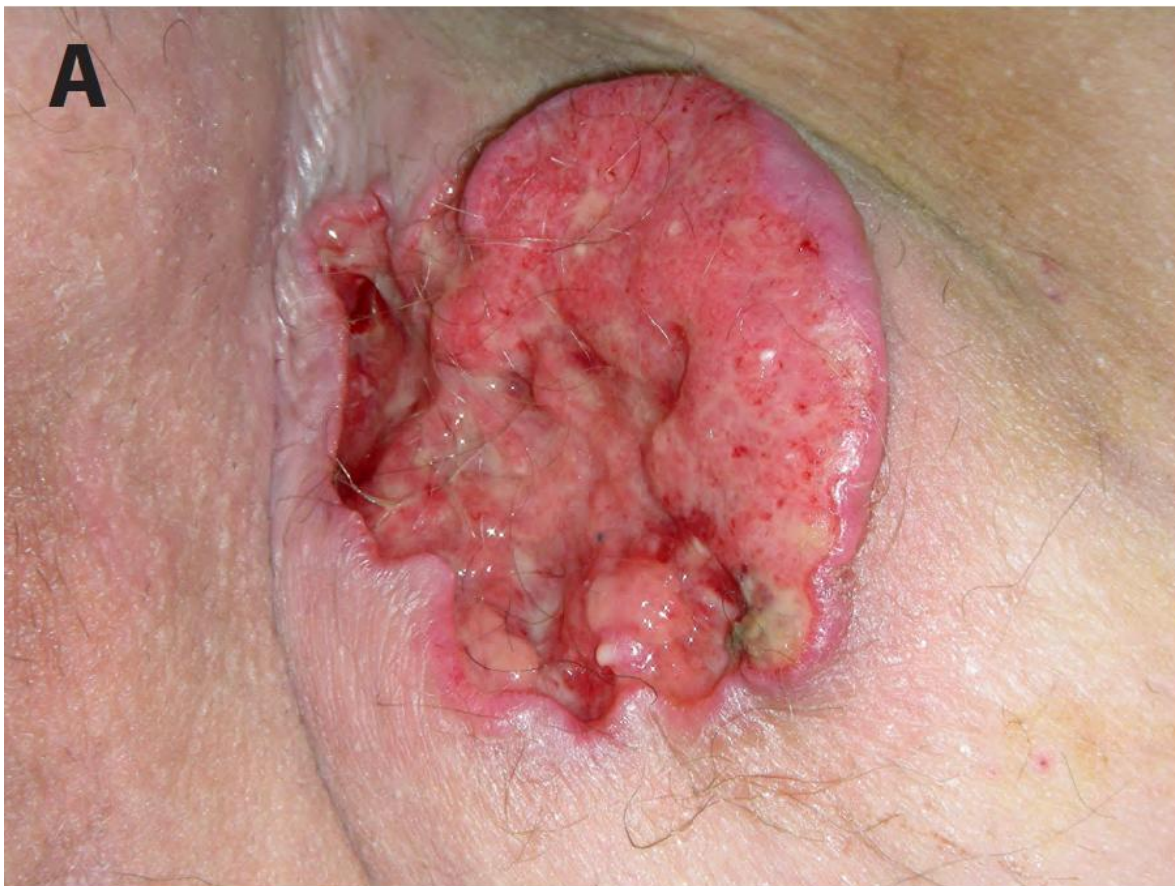**B**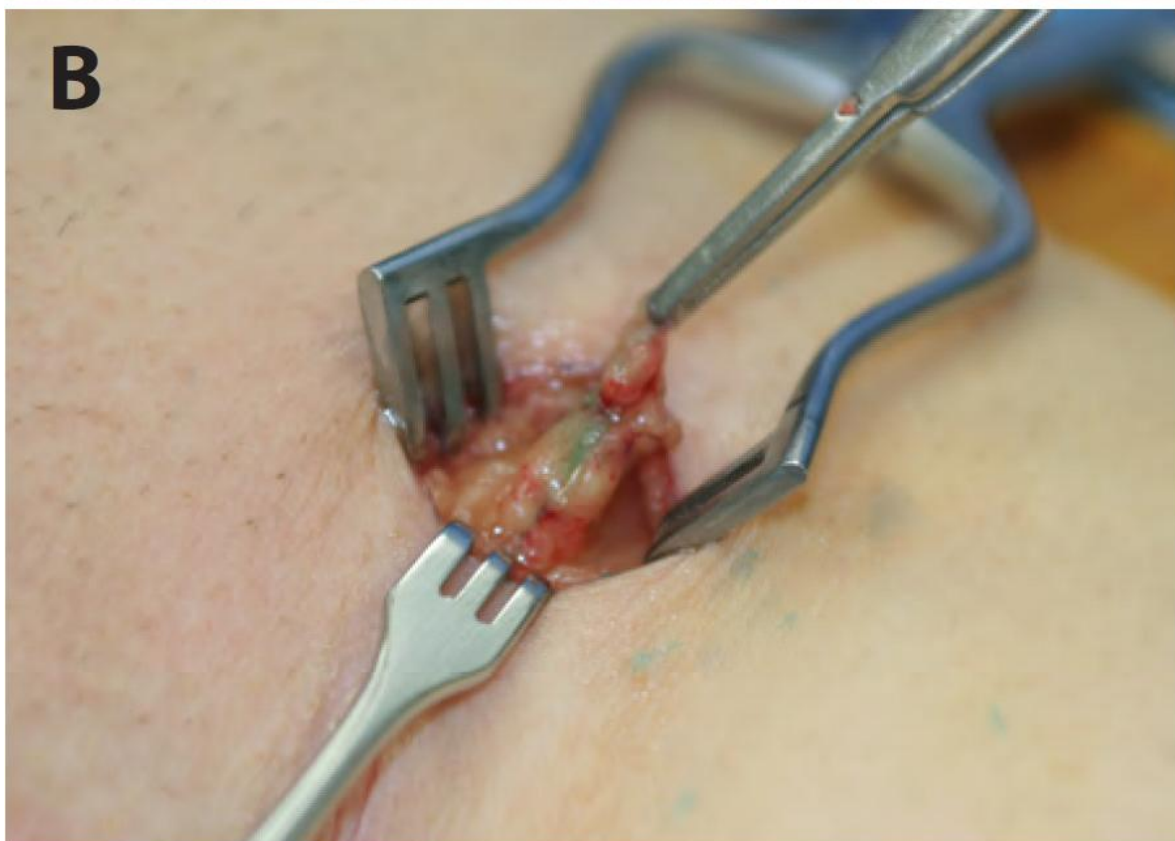

Supplement: MOESM1 [file 9565974]
